# Supplementary material for: Genome-Wide Association Analyses Highlight the Potential for Different Genetic Mechanisms for Litter Size Among Sheep Breeds
Source: Front Genet. 2018 Apr 10;9:118. doi: 10.3389/fgene.2018.00118 (PMC5902979; doi:10.3389/fgene.2018.00118)
Supplement: Supplementary file 12 [file Data_Sheet_1.DOCX]

**Supplementary Information**

# Genome-wide association analyses highlights the potential for different genetic mechanisms for litter size among sheep breeds

# Song-Song Xu1,2,†, Lei Gao3,4,†, Xing-Long Xie1,2, Yan-Ling Ren5, Zhi-Qiang Shen5, Feng Wang6, Min Shen3,4, Emma Eyþórsdóttir7, Jón Hallsteinn Hallsson7, Tatyana Kiseleva8, Juha Kantanen9, Meng-Hua Li1,*

1CAS Key Laboratory of Animal Ecology and Conservation Biology, Institute of Zoology, Chinese Academy of Sciences (CAS), Beijing 100101, China

2University of Chinese Academy of Sciences (UCAS), Beijing 100049, China

3Institute of Animal Husbandry and Veterinary Medicine, Xinjiang Academy of Agricultural and Reclamation Sciences, Shihezi 832000, China

4State Key Laboratory of Sheep Genetic Improvement and Healthy Breeding, Xinjiang Academy of Agricultural and Reclamation Sciences, Shihezi 832000, China

5Shandong Binzhou Academy of Animal Science and Veterinary Medicine, Binzhou 256600, China

6Institute of Sheep and Goat Science, Nanjing Agricultural University, Nanjing 210095, China

7Faculty of Natural Resources and Environmental Sciences, Agricultural University of Iceland, Iceland

8All-Russian Research Institute for Farm Animal Genetics and Breeding, Russian Academy of Sciences, 55-a Moskovskoe Shosse, St. Petersburg-Pushkin 199601, Russia

9Green Technology, Natural Resources Institute Finland (Luke), Jokioinen 31600, Finland

†These authors contributed equally to this work.

*****Corresponding author: M.-H. Li, Institute of Zoology, Chinese Academy of Sciences, Beichen West Road No. 1-5, Chaoyang District, Beijing 100101, China; E-mail: [menghua.li@ioz.ac.cn](mailto:menghua.li@ioz.ac.cn); Tel.: +86-10-64806336; Fax: +86-10-64806336

**MATERIALS AND METHODS**

Genotyping for all the samples was conducted using the Illumina Ovine Infinium HD SNP BeadChip and yielded a dataset of 606 006 SNPs. We implemented quality control of these SNPs using PLINK v1.07 software. The SNPs or individuals were excluded if they met any of the criteria: (1) no chromosomal or physical location, (2) call rate < 0.95, (3) missing genotype frequency > 0.05, and/or (4) minor allele frequency (MAF) < 0.05. SNPs were excluded from the analysis if a p-value of Fisher’s exact test for Hardy-Weinberg equilibrium less than 0.001. After filtering, a total of 406505 SNPs and 485 individuals were retained in the working dataset for the genome-wide association study (GWAS).

We performed the GWAS using a two-step approach via the general linear model and genome-wide efficient mixed-model analysis (GEMMA) across the six breeds. The first five principal components from a multi-dimensional scaling analysis were used as covariates to account for the biases caused by the population stratification in the GWAS. The models were detailed below:

(1) Residual calculation:

*y*=*µ* +*Tc* + *e* (model 1)

where *y* is the mean of litter size, *µ* is overall population mean, *c* is the first five principal components effect, *e* is the residual, *T* are the corresponding matrix vectors.

(2) Genome-wide efficient mixed-model analysis (GEMMA):

*e*=*µ**+ *Gk*+ *e** (model 2)

where *e* from the residual in model (1) is taken as the phenotype, *µ** is mean value of the population, *k* is the SNP effect, *G* is the genotype matrix vector, and *e** is the residual.

**RESULTS**

In the GWAS, we identified 17 SNPs (Table 2) at the chromosome- wise at the 5% level after the Bonferroni correction (Table 1). The annotation of the genes neighboring significant SNPs showed that no genes were associated with reproduction in human and livestock (Table 2).

**TABLE 1.** Bonferroni-corrected 5% chromosome-wise significance threshold in sheep.

| **Chromosome** | **5% chromosome-wide significance threshold** |
| --- | --- |
| 1 | 1.19732E-05 |
| 2 | 1.34156E-05 |
| 3 | 1.44634E-05 |
| 4 | 2.67237E-05 |
| 5 | 2.75028E-05 |
| 6 | 2.81057E-05 |
| 7 | 3.02663E-05 |
| 8 | 3.39674E-05 |
| 9 | 3.27869E-05 |
| 10 | 4.06835E-05 |
| 11 | 4.19463E-05 |
| 12 | 3.6049E-05 |
| 13 | 3.63901E-05 |
| 14 | 4.15628E-05 |
| 15 | 3.85802E-05 |
| 16 | 4.05515E-05 |
| 17 | 3.8432E-05 |
| 18 | 4.34783E-05 |
| 19 | 4.4405E-05 |
| 20 | 5.29101E-05 |
| 21 | 5.75374E-05 |
| 22 | 5.19751E-05 |
| 23 | 4.40141E-05 |
| 24 | 6.47668E-05 |
| 25 | 5.82751E-05 |
| 26 | 6.03865E-05 |
| 27 | 3.71747E-05 |

**TABLE 2.** Bonferroni-corrected genome-wide and chromosome-wise significant SNPs and their nearest gene based on the GWAS in the six sheep. The *p*_value corresponds to the corrected significance of GWAS after principle component adjustment. The symbol (/) denotes that no genes are located on upstream and downstream of the tested SNPs.

| **Chromosome** | **SNP** | **Position (bp)** | ***p*_value** | **Genes** |
| --- | --- | --- | --- | --- |
| 1 | *rs414097122* | 101017356 | 3.79075E-06 | *RPTN, TCHHL1* |
| 1 | [*rs421804262*](https://www.ncbi.nlm.nih.gov/projects/SNP/snp_ref.cgi?rs=421804262) | 213012691 | 9.82729E-06 | *TNFSF10, FNDC3B* |
| 3 | [*rs414883354*](https://www.ncbi.nlm.nih.gov/projects/SNP/snp_ref.cgi?rs=414883354) | 190445419 | 6.87487E-06 | *SOX5* |
| 7 | [*rs407090947*](https://www.ncbi.nlm.nih.gov/projects/SNP/snp_ref.cgi?rs=407090947) | 66997144 | 4.40251E-06 | */* |
| 7 | [*rs416107809*](https://www.ncbi.nlm.nih.gov/projects/SNP/snp_ref.cgi?rs=416107809) | 66996410 | 5.59763E-06 | */* |
| 7 | [*rs420563500*](https://www.ncbi.nlm.nih.gov/projects/SNP/snp_ref.cgi?rs=420563500) | 28748839 | 2.0192E-05 | */* |
| 8 | [*rs426132198*](https://www.ncbi.nlm.nih.gov/projects/SNP/snp_ref.cgi?rs=426132198) | 80603256 | 2.67054E-05 | *ZDHHC14* |
| 9 | [*rs400338438*](https://www.ncbi.nlm.nih.gov/projects/SNP/snp_ref.cgi?rs=400338438) | 91638261 | 2.50914E-05 | */* |
| 13 | *rs401592525* | 74413590 | 0.000011812 | *CDH22* |
| 14 | *rs400451936* | 56825967 | 1.61753E-05 | *PPP2R1A* |
| 16 | *rs414466013* | 30002131 | 2.81048E-05 | *MRPS30* |
| 17 | *rs422278203* | 18769443 | 1.82719E-05 | */* |
| 18 | *rs410531171* | 27261934 | 1.14478E-05 | *NSMCE3, FAM189A1, APBA2* |
| 20 | *rs412602669* | 41077012 | 1.44514E-05 | */* |
| 21 | *rs408253270* | 33212072 | 5.59613E-06 | *OPCML* |
| 24 | *rs411677584* | 37445078 | 3.00536E-05 | *NPTX2, BAIAP2L1, BRI3* |
| 27 | *rs421683185* | 95411539 | 3.49887E-05 | *PHF6, CCDC160, HPRT1* |
