# Supplementary material for: Genome-Wide Association Analyses Highlight the Potential for Different Genetic Mechanisms for Litter Size Among Sheep Breeds
Source: Front Genet. 2018 Apr 10;9:118. doi: 10.3389/fgene.2018.00118 (PMC5902979; doi:10.3389/fgene.2018.00118)
Supplement: TABLE S1 — Parity effect for litter size and pairwise statistical comparisons between means of litter size in parity’s clades in the six breeds. [file Table_1.XLSX]

## Sheet: Parity Effect
Table S1. Parity effect for litter size in the six breeds
Breeds	Parity Effect
Wadi	<0.001
Hu	0.0013
Icelandic	<0.001
Finnsheep	0.2881
Romanov	0.0528
Texel	0.0195

## Sheet: Pairwise statistical
Table S1.Pairwise statistical comparisons between means of litter size in parity’s clades.
Breeds	Parity
	LS1	LS2	LS3	LS4	LS5	LS6	LS7	LS8	LS9	LS10
Wadi	1.88±0.05b	2.13±0.07a	2.50±0.18a	3.00±0.39a	/	/	/	/	/	/
Hu	1.70±0.05b	1.92±0.05a	2.03±0.09a	/	/	/	/	/	/	/
Icelandic	1.47±0.08b	1.88±0.06a	2.00±0.06a	1.98±0.07a	1.86±0.07a	2.06±0.08a	1.84±0.11ab	2.18±0.14a	2.00±0.21ab	2.00±0.27ab
Finnsheep	2.50±0.14a	2.62±0.14a	3.00±0.15a	2.64±0.16a	2.75±0.19a	2.67±0.23a	2.36±0.32a	3.20±0.47a	/	/
Romanov	2.24±0.10b	2.30±0.10ab	2.39±0.11ab	2.74±0.14a	2.47±0.16ab	2.63±0.20ab	/	/	/	/
Texel	1.37±0.07a	1.48±0.07a	1.51±0.08a	1.47±0.08a	1.70±0.09a	1.72±0.12a	1.75±0.16a	2.00±0.27a	/	/
